# Supplementary material for: Global gridded crop models underestimate yield losses from climatic extremes
Source: Research Square preprint supplement (doi:10.21203/rs.3.rs-7181139/v1), 2026-02-06
Supplement: Supplementary file 1 [file 0688b020b9b9efd59f824cc0.xlsx]

## Sheet: Global counts per crop
Crop	Climate extreme	Occurrences (gridcell-year combinations)	Figures
mai	Dry	5577	Appendix
mai	Hot	3139	Appendix
mai	Wet	3547	Appendix
mai	Hot & Dry	1035	Appendix
wwh	Dry	2538	Appendix
wwh	Hot	1321	Appendix
wwh	Wet	1760	Appendix
wwh	Hot & Dry	350	Appendix
ri1	Dry	2221	Appendix
ri1	Hot	1017	Appendix
ri1	Wet	2309	Appendix
ri1	Hot & Dry	223	Appendix
soy	Dry	1529	Appendix
soy	Hot	705	Appendix
soy	Wet	1190	Appendix
soy	Hot & Dry	271	Appendix
aggr	Dry	14470	Main
aggr	Hot	7549	Main
aggr	Wet	10900	Main
aggr	Hot & Dry	1523	Main

## Sheet: regional counts for aggregated 
These data points are used in the regional heatmaps
Climate extreme	Region	Occurrences
Dry	Caribbean	12	Note, we filtered out the Carribean because too few data points
Dry	Central America	324
Dry	Central Asia	1140
Dry	Eastern Africa	2241
Dry	Eastern Asia	1156
Dry	Eastern Europe	120
Dry	Middle Africa	767
Dry	Northern Africa	48
Dry	Northern America	2859
Dry	Northern Europe	31
Dry	South America	2228
Dry	South-Eastern Asia	612
Dry	Southern Africa	413
Dry	Southern Asia	910
Dry	Southern Europe	556
Dry	Western Africa	1118
Dry	Western Asia	387
Dry	Western Europe	141
Hot	Australia and New Zealand	302
Hot	Caribbean	1	Note, we filtered out the Carribean because too few data points
Hot	Central America	132
Hot	Central Asia	584
Hot	Eastern Africa	994
Hot	Eastern Asia	415
Hot	Eastern Europe	68
Hot	Middle Africa	382
Hot	Northern Africa	83
Hot	Northern America	1539
Hot	Northern Europe	40
Hot	South America	1012
Hot	South-Eastern Asia	303
Hot	Southern Africa	290
Hot	Southern Asia	507
Hot	Southern Europe	268
Hot	Western Africa	370
Hot	Western Asia	158
Hot	Western Europe	140
Hot & Dry	Australia and New Zealand	133
Hot & Dry	Caribbean	3	Note, we filtered out the Carribean because too few data points
Hot & Dry	Central America	35
Hot & Dry	Central Asia	423
Hot & Dry	Eastern Africa	371
Hot & Dry	Eastern Asia	146
Hot & Dry	Eastern Europe	55
Hot & Dry	Middle Africa	64
Hot & Dry	Northern Africa	3
Hot & Dry	Northern America	865
Hot & Dry	Northern Europe	36
Hot & Dry	South America	430
Hot & Dry	South-Eastern Asia	124
Hot & Dry	Southern Africa	69
Hot & Dry	Southern Asia	80
Hot & Dry	Southern Europe	136
Hot & Dry	Western Africa	164
Hot & Dry	Western Asia	47
Hot & Dry	Western Europe	49
Wet	Australia and New Zealand	210
Wet	Caribbean	10	Note, we filtered out the Carribean because too few data points
Wet	Central America	144
Wet	Central Asia	585
Wet	Eastern Africa	1544
Wet	Eastern Asia	1165
Wet	Eastern Europe	72
Wet	Middle Africa	770
Wet	Northern Africa	103
Wet	Northern America	1961
Wet	Northern Europe	88
Wet	South America	2058
Wet	South-Eastern Asia	356
Wet	Southern Africa	253
Wet	Southern Asia	904
Wet	Southern Europe	347
Wet	Western Africa	610
Wet	Western Asia	191
Wet	Western Europe	167
